# Supplementary material for: Human phenotype ontology annotation and cluster analysis to unravel genetic defects in 707 cases with unexplained bleeding and platelet disorders
Source: PubMed Central journal article supplement (PMC4422517; doi:10.1186/s13073-015-0151-5), 2015-04-09
Supplement: 13073_2015_151_MOESM3_ESM.pdf [file 13073_2015_151_MOESM3_ESM.pdf]

**Additional file 3: HPO terms added to enable annotation of bleeding and platelet phenotypes.**

| <b>HPO ID</b> | <b>HPO Term</b>                                              |
|---------------|--------------------------------------------------------------|
| HP:0001973    | Autoimmune thrombocytopenia                                  |
| HP:0003540    | Impaired platelet aggregation                                |
| HP:0005527    | Reduced kininogen activity                                   |
| HP:0005528    | Bone marrow hypocellularity                                  |
| HP:0005561    | Abnormality of bone marrow cell morphology                   |
| HP:0008148    | Impaired epinephrine-induced platelet aggregation            |
| HP:0011870    | Impaired arachidonic acid-induced platelet aggregation       |
| HP:0011871    | Impaired ristocetin-induced platelet aggregation             |
| HP:0011872    | Impaired thrombin-induced platelet aggregation               |
| HP:0011877    | Increased mean platelet volume                               |
| HP:0011878    | Abnormal platelet membrane protein expression                |
| HP:0011879    | Decreased platelet glycoprotein Ib-IX-V                      |
| HP:0011881    | Decreased platelet glycoprotein VI                           |
| HP:0011882    | Decreased platelet P2Y12 receptor                            |
| HP:0011883    | Abnormal platelet granules                                   |
| HP:0011894    | Impaired thromboxane A2 agonist-induced platelet aggregation |
| HP:0012483    | Abnormal alpha granules                                      |
| HP:0012484    | Abnormal dense granules                                      |
| HP:0012491    | Abnormal dense tubular system                                |
| HP:0004813    | Post-transfusion thrombocytopenia                            |
| HP:0002584    | Intestinal bleeding                                          |
| HP:0007420    | Spontaneous hematomas                                        |
| HP:0007902    | Vitreous hemorrhage                                          |
| HP:0011884    | Abnormal umbilical stump bleeding                            |
| HP:0011885    | Hemorrhage of the eye                                        |
| HP:0011888    | Bleeding requiring red cell transfusion                      |
| HP:0011890    | Prolonged bleeding following procedure                       |
| HP:0011891    | Post-partum hemorrhage                                       |
| HP:0011895    | Anemia due to reduced life span of red cells                 |
| HP:0011896    | Subconjunctival hemorrhage                                   |
| HP:0011897    | Neutrophilia                                                 |
| HP:0011898    | Abnormality of circulating fibrinogen                        |
| HP:0011899    | Hyperfibrinogenemia                                          |
| HP:0011901    | Dysfibrinogenemia                                            |
| HP:0012130    | Abnormality of cells of the erythroid lineage                |
| HP:0012131    | Abnormal number of erythroid precursors                      |

|            |                                                  |
|------------|--------------------------------------------------|
| HP:0012132 | Erythroid hyperplasia                            |
| HP:0012133 | Erythroid hypoplasia                             |
| HP:0012135 | Abnormality of cells of the granulocytic lineage |
| HP:0100827 | Lymphocytosis                                    |
| HP:0012146 | Abnormality of von Willebrand factor             |
| HP:0012147 | Reduced quantity of von Willebrand factor        |
| HP:0012148 | Multiple lineage myelodysplasia                  |
| HP:0012149 | Bilineage myelodysplasia                         |
| HP:0012150 | Single lineage myelodysplasia                    |
| HP:0008320 | Impaired collagen-induced platelet aggregation   |
| HP:0011873 | Abnormal platelet count                          |
| HP:0011875 | Abnormal platelet morphology                     |
| HP:0011889 | Bleeding with no or minor trauma                 |
| HP:0011869 | Abnormal platelet function                       |
| HP:0011874 | Heparin-induced thrombocytopenia                 |
| HP:0011876 | Abnormal platelet volume                         |
| HP:0011880 | Acute disseminated intravascular coagulation     |
| HP:0011886 | Hyphema                                          |
| HP:0011887 | Choroid hemorrhage                               |
| HP:0011892 | Vitamin K deficiency                             |
| HP:0011893 | Abnormal leukocyte count                         |
| HP:0011900 | Hypofibrinogenemia                               |
| HP:0011902 | Abnormal hemoglobin                              |
| HP:0011903 | Hemoglobin H                                     |
| HP:0011904 | Persistence of hemoglobin F                      |
| HP:0011905 | Reduced hemoglobin A                             |
| HP:0011906 | Reduced beta/alpha synthesis ratio               |
| HP:0011907 | Reduced alpha/beta synthesis ratio               |
| HP:0011908 | Unilateral radial aplasia                        |
| HP:0011909 | Flattened metacarpal heads                       |
| HP:0011910 | Shortening of all phalanges of fingers           |
| HP:0011911 | Abnormality of metocarpophalangeal joint         |
| HP:0003010 | Prolonged bleeding time                          |
| HP:0012524 | Abnormal platelet shape                          |
| HP:0012525 | Abnormal alpha granule distribution              |
| HP:0012526 | Absence of alpha granules                        |
| HP:0012527 | Abnormal alpha granule content                   |
| HP:0012528 | Abnormal number of alpha granules                |
| HP:0012529 | Abnormal dense granule content                   |

|            |                                   |
|------------|-----------------------------------|
| HP:0012530 | Abnormal number of dense granules |
| HP:0011460 | Embryonal onset                   |
| HP:0011461 | Fetal onset                       |
